# Supplementary material for: Long noncoding RNA ROR regulates chemoresistance in docetaxel-resistant lung adenocarcinoma cells via epithelial mesenchymal transition pathway
Source: PubMed Central journal article supplement (PMC5464857; doi:10.18632/oncotarget.16562), 2017-03-25
Supplement: oncotarget-08-33144-s001.pdf [file oncotarget-08-33144-s001.pdf]

## Long noncoding RNA ROR regulates chemoresistance in docetaxel-resistant lung adenocarcinoma cells via epithelial mesenchymal transition pathway

Supplementary Materials

**Supplemental Table 1: Initial profiling of lncRNAs in docetaxel-resistant cells (SPC-A1/DTX and H1299/DTX) compared with parental cells (SPC-A1 and H1299)**

|   | LncRNAs               | fold-change |
|---|-----------------------|-------------|
| 1 | CUST_421_PI428631609  | 9.972491    |
| 2 | pl053552              | 9.575738    |
| 3 | lnc-ROR               | 9.053626    |
| 4 | CUST_2222_PI428631609 | 8.7036495   |
| 5 | CUST_6987_PI428631609 | 8.667568    |
| 6 | pl011310              | 8.39463     |

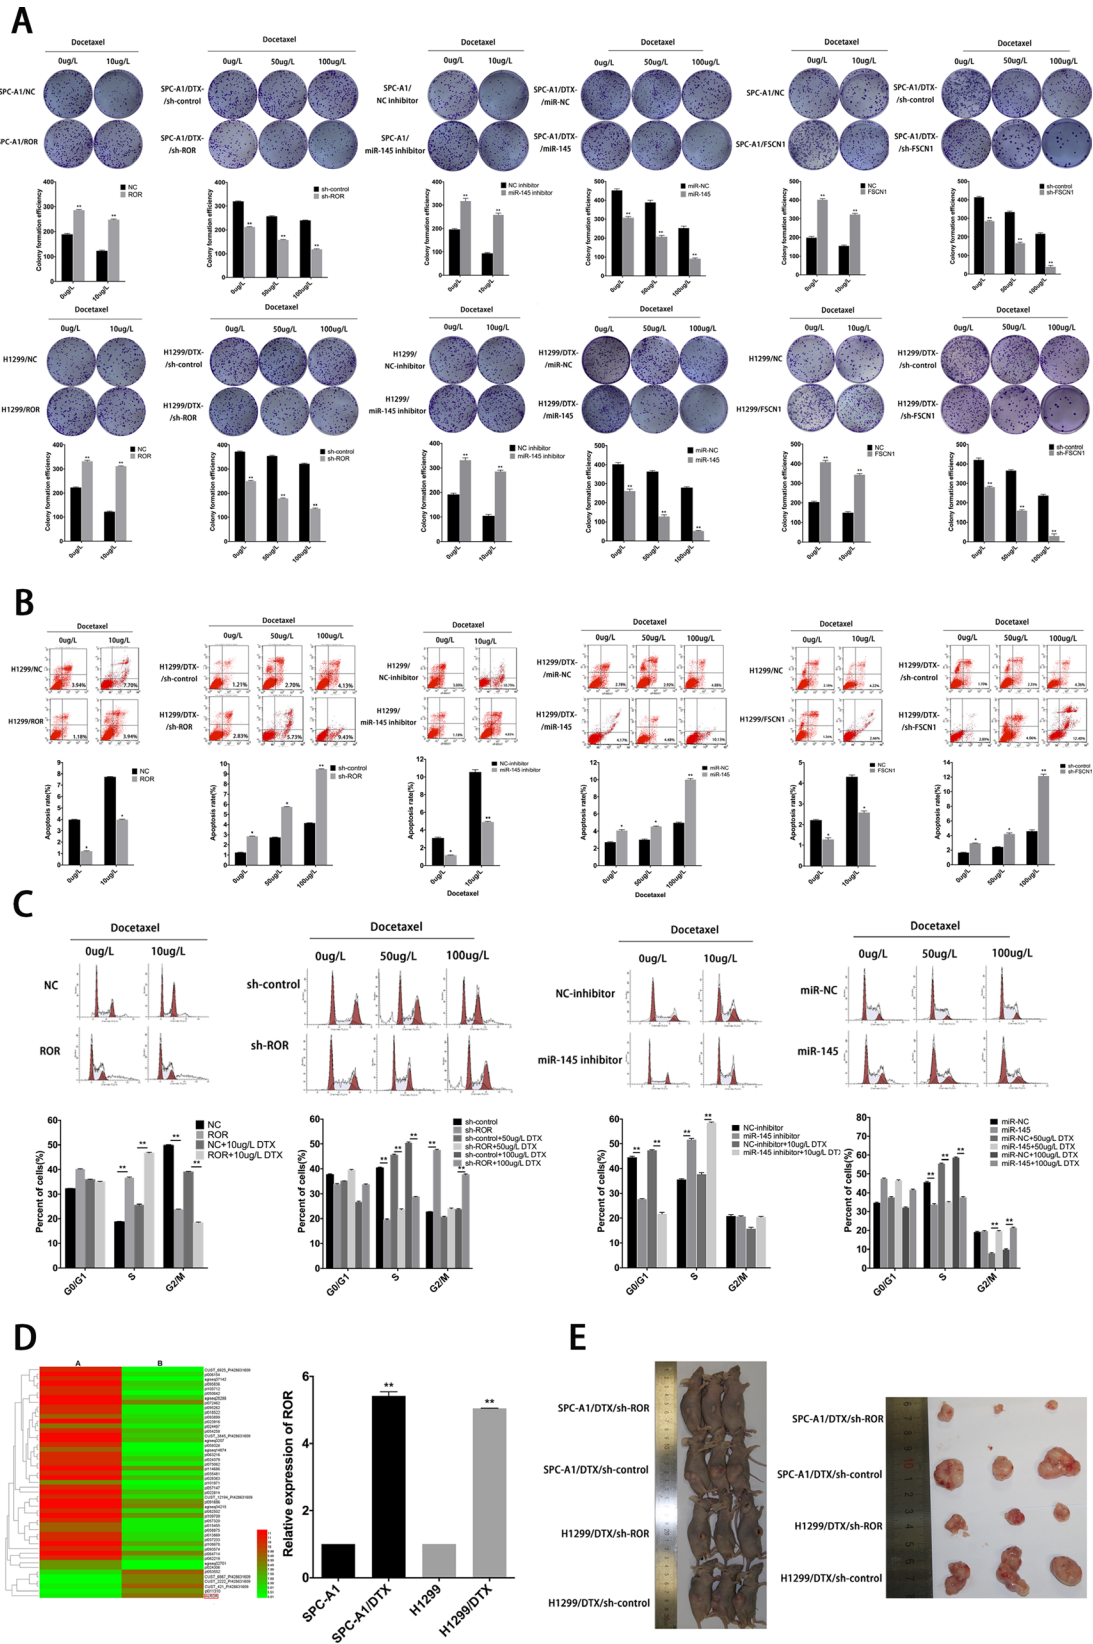

**Supplementary Figure 1:** (A) Colony formation assays to measure cell proliferation in parental cells (SPC-A1 and H1299) transfected with linc-ROR or miR-145 inhibitor or FSCN1, and docetaxel-resistant cells (SPC-A1/DTX and H1299/DTX) transfected with sh-ROR or miR-145 mimics or sh-FSCN1. (B, C) Flow cytometry analysis to measure apoptosis and cell cycle in H1299 cells transfected with linc-ROR or miR-145 inhibitor or FSCN1, and H1299/DTX cells transfected with sh-ROR or sh-FSCN1. (D) Differences lincRNAs expression levels between mixture A (SPC-A1 and H1299) and mixture B (SPC-A1/DTX and H1299/DTX). The expression level of linc-ROR was significantly upregulated in mixture B (9.05-fold). (E) Expression level of linc-ROR in parental and docetaxel-resistant LAD cell lines. Data are presented as mean  $\pm$  standard error based on at least three independent experiments. \* $p < 0.05$ , \*\* $p < 0.01$ .

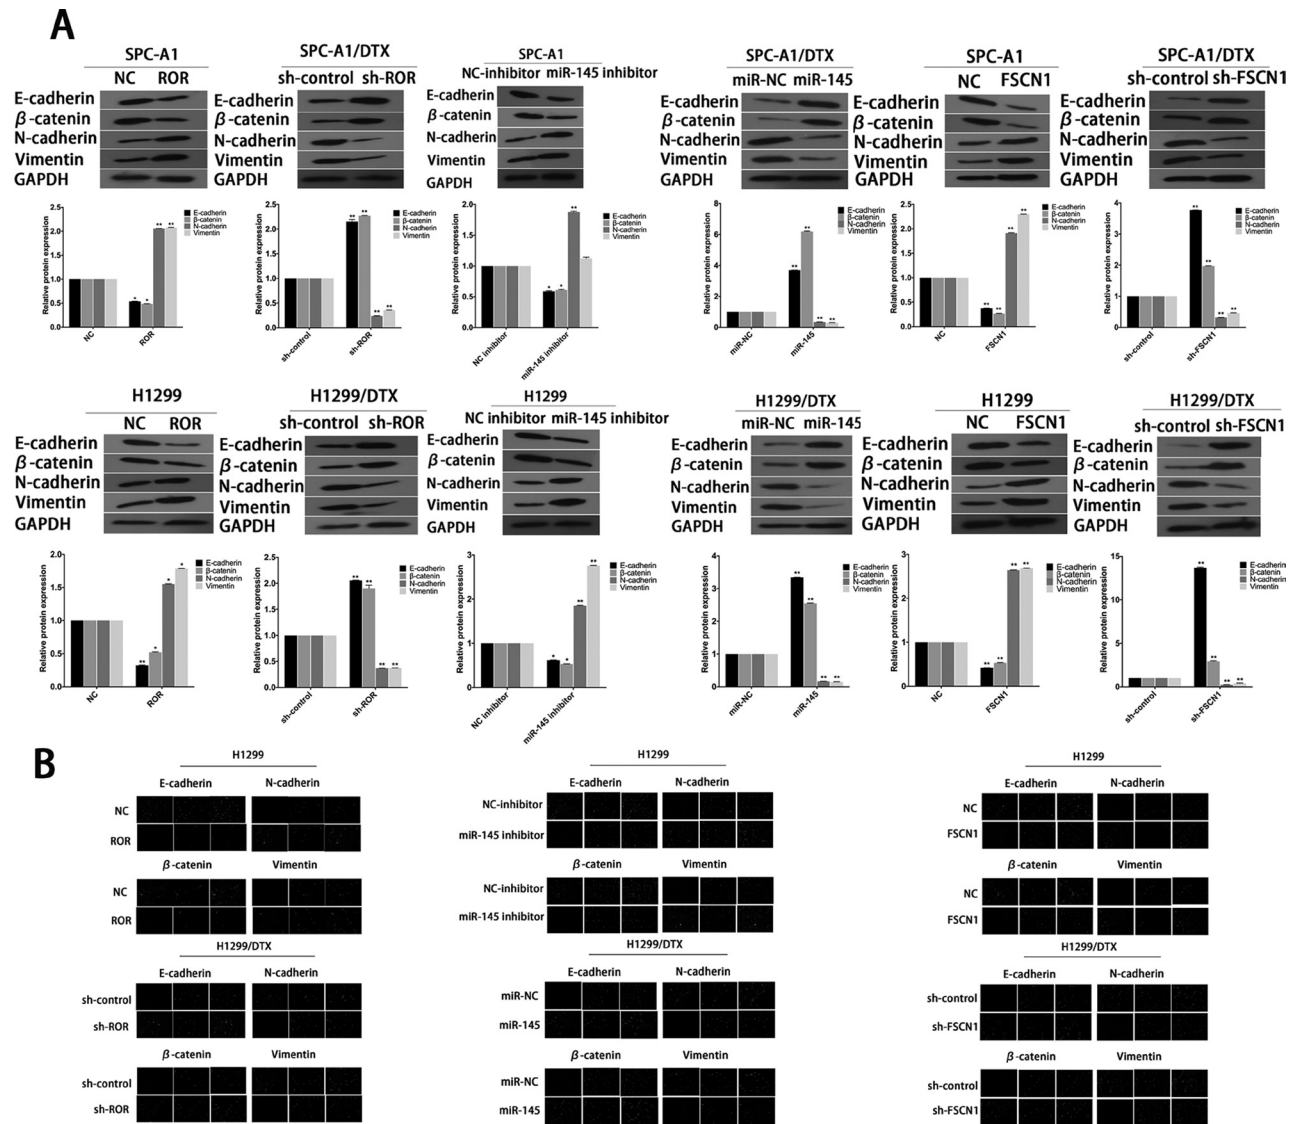

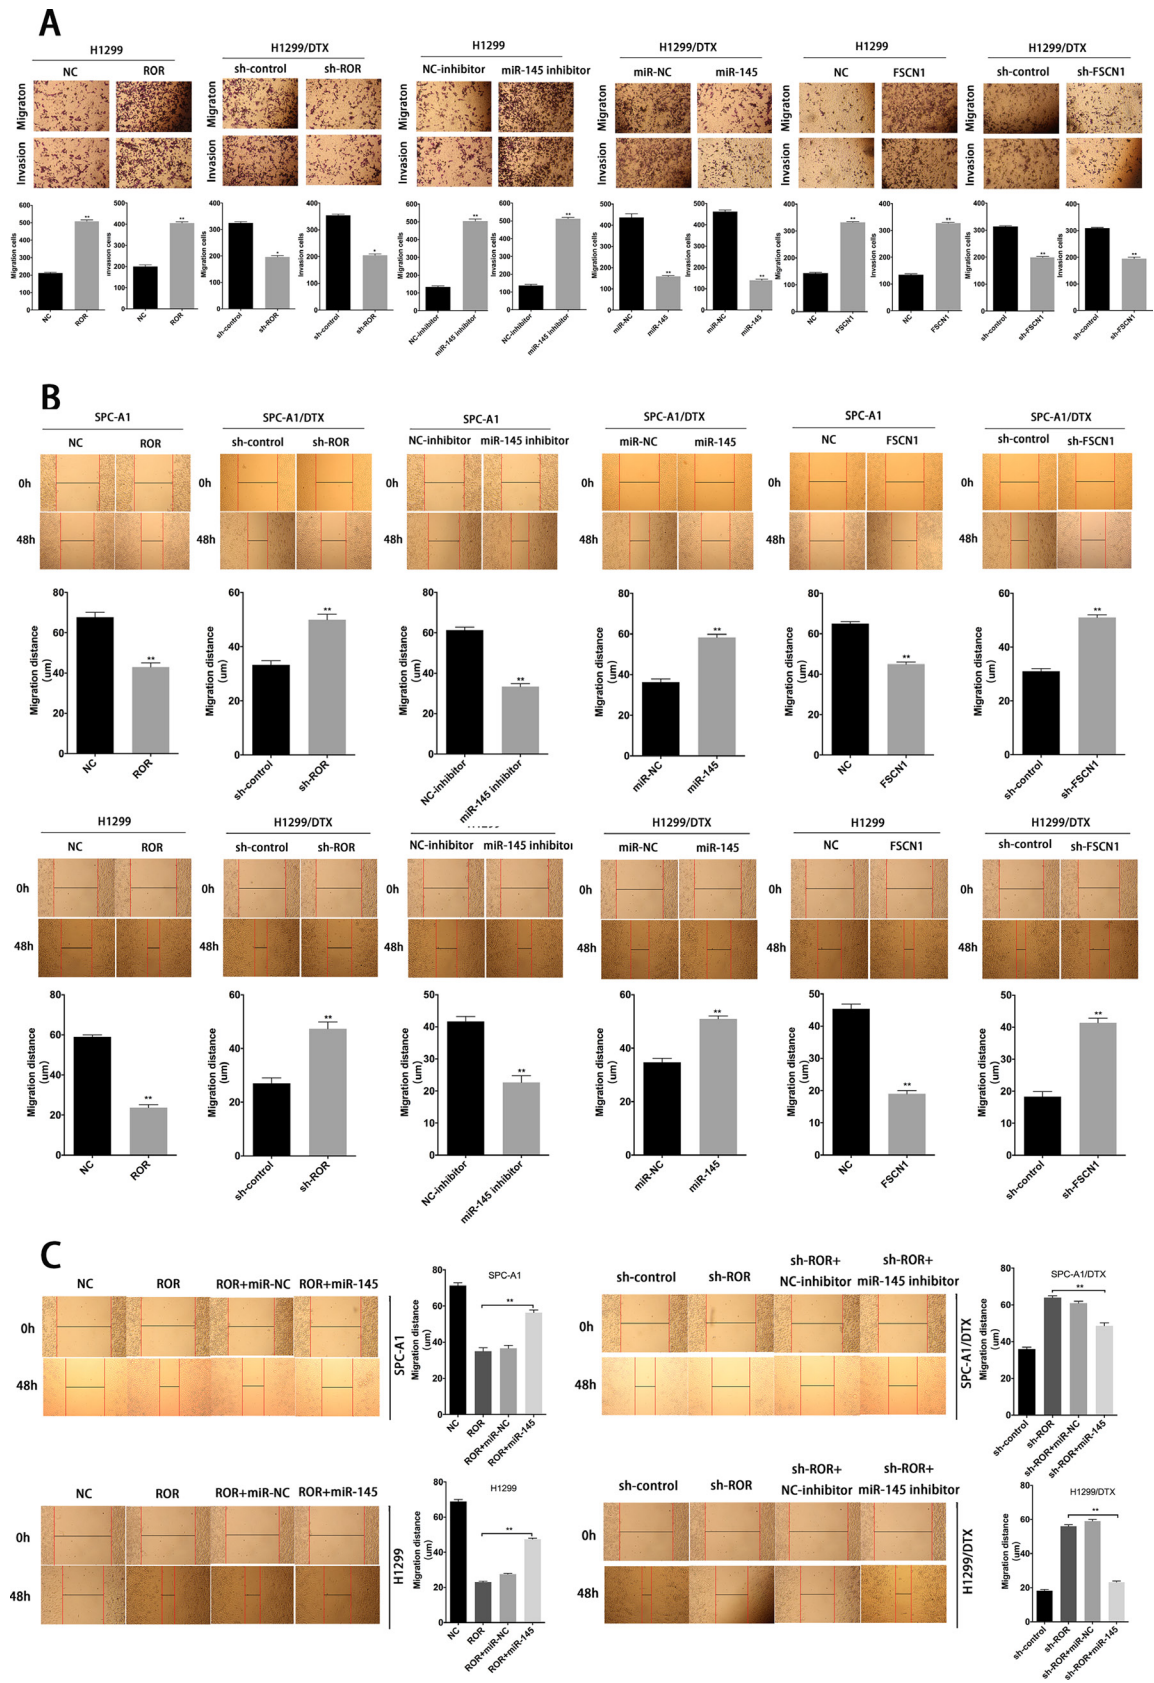

**Supplementary Figure 3: (A)** Transwell assays to determine cell migration and invasion ability of H1299 cells transfected with linc-ROR or miR-145 inhibitor or FSCN1, and H1299/DTX cells transfected with sh-ROR or miR-145 mimics or sh-FSCN1. **(B)** Wound healing assays to determine cell migration and invasion ability of parental cells transfected with linc-ROR or miR-145 inhibitor or FSCN1, and docetaxel-resistant cells transfected with sh-ROR or miR-145 mimics or sh-FSCN1. **(C)** Metastasis capacity of parental cells stably transfected with linc-ROR and docetaxel-resistant cells stably transfected with sh-ROR was partially reversed by miR-145 mimics and miR-145 inhibitor, respectively.
